# Supplementary material for: Overexpression of Semaphorin-3E enhances pancreatic cancer cell growth and associates with poor patient survival
Source: PubMed Central journal article supplement (PMC5349999; doi:10.18632/oncotarget.13704), 2016-11-29
Supplement: oncotarget-07-87431-s001.pdf [file oncotarget-07-87431-s001.pdf]

## Overexpression of Semaphorin-3E enhances pancreatic cancer cell growth and associates with poor patient survival

### SUPPLEMENTARY FIGURES AND TABLE

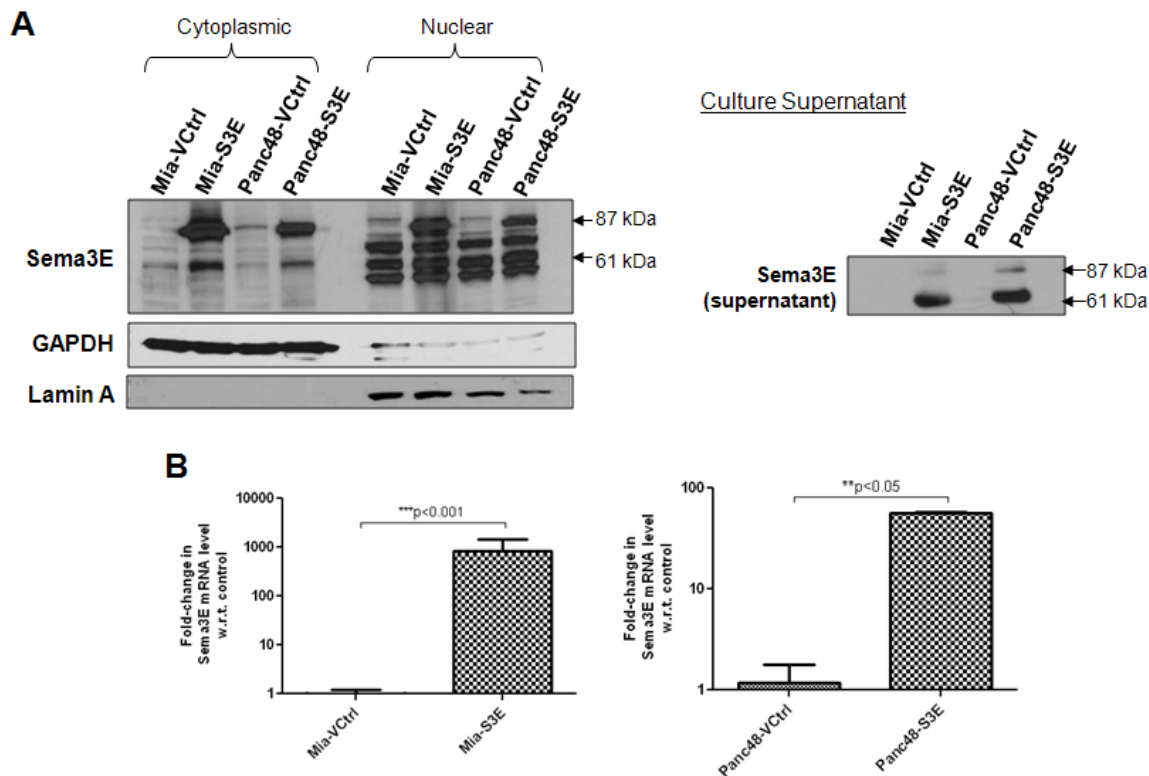

**Supplementary Figure S1: Sema3E expression is increased in both the nucleus and cytoplasm in Sema3E-overexpressing cell lines.** **A.** Subcellular fractionation was performed on vector control-transduced cells (Mia-VCtrl and Panc48-VCtrl) and Sema3E cDNA-transduced cells (Mia-S3E and Panc48-S3E). Immunoblot analysis shows that in the cytoplasmic fractions (left panel), there was a significant increase in Sema3E protein expression, in both the full-length 87 kDa protein and furin-cleaved 61 kDa protein fragment, in Mia-S3E and Panc48-S3E cells compared to their respective controls. In the nuclear fractions (left panel), only the full-length protein was increased in the Sema3E-overexpressing cells compared to the controls. Two other unidentified/unknown bands, in addition to the 61 kDa and 87 kDa bands, were observed. Both the 61 kDa and full-length 87 kDa protein were also present in the culture supernatant of Mia-S3E and Panc48-S3E cells but not in the controls (right panel). **B.** RT-PCR analysis shows a significant fold-increase in Sema3E gene expression in Mia-S3E (Student's t-test, \*\*\*p<0.001) and Panc48-S3E cells (Student's t-test, \*\*p<0.01) compared to their respective controls.

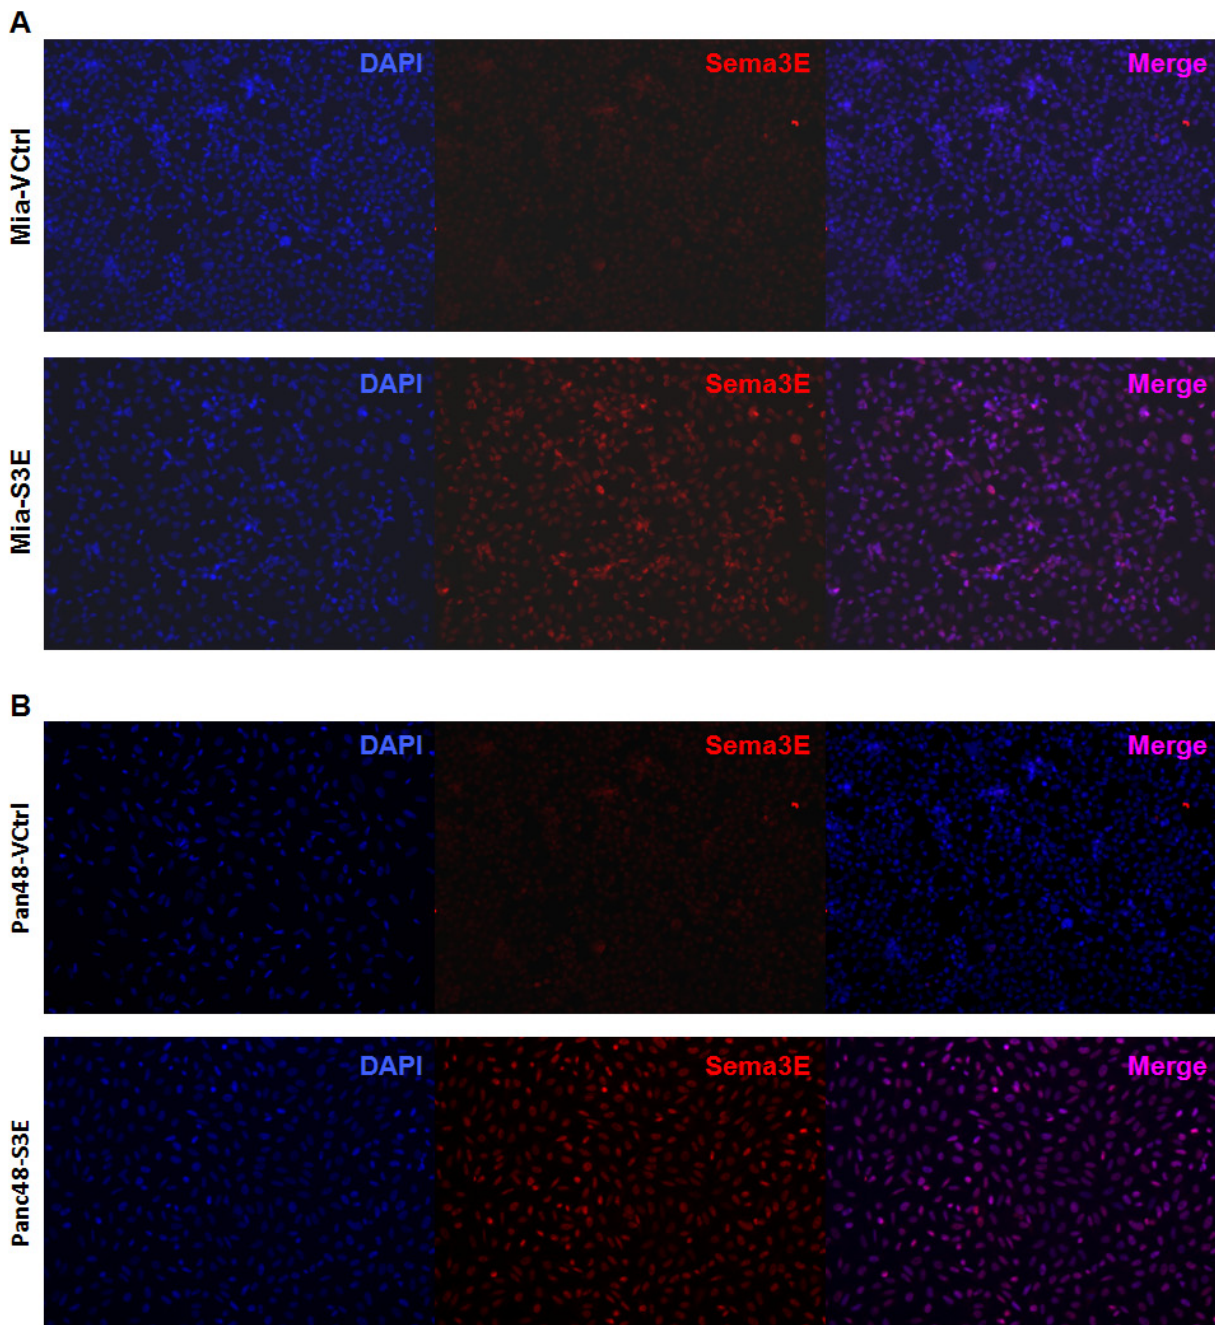

**Supplementary Figure S2: Immunofluorescence staining of Sema3E expression in Sema3E overexpressed cells.** Mia-S3E and Panc48-S3E cells and their controls shows that there is a significant increase in Sema3E protein expression in S3E-overexpressing cells compared to the controls in both the cytoplasm and the nucleus, but especially in the nucleus. Blue color is for DAPI staining in the nucleus, red color is for Sema3E staining. After merging the two pictures, purple color is the indication of Sema3E localization mainly in the nucleus.

**Supplementary Table S1: Significantly up- and down-regulated proteins in Mia-S3E vs. Mia-VCtrl cells as identified by RPPA analysis**

| <b>Protein</b>                  | <b>Fold Change (Mia-S3E vs. Mia-VCtrl)</b> |
|---------------------------------|--------------------------------------------|
| p-p44/42MAPK(Erk1/2)(T202/Y204) | 8.909141207                                |
| FSP1/S100A4                     | 2.971429258                                |
| KLF4                            | 2.814975424                                |
| Integrinb4                      | 2.81052884                                 |
| p21                             | 2.692373231                                |
| LRP6                            | 2.566232434                                |
| p27/KIP1(C-term)                | 2.017179339                                |
| p-Stat3(S727)                   | 1.866475526                                |
| Vimentin(D21H3)                 | 1.822892956                                |
| PI3Kp85                         | 1.813637807                                |
| MEK6                            | 1.797559966                                |
| p-MEK1/2(S217/221)              | 1.751305479                                |
| Bad                             | 1.696594105                                |
| p-Bad(S112)                     | 1.675391666                                |
| AMPKa(F6)                       | 1.640102627                                |
| LDHA                            | 1.61980421                                 |
| Stat3(D3Z2G)                    | 1.605838639                                |
| FoxO1(C29H4)                    | 1.594812326                                |
| p-Akt(S473)                     | 1.539911207                                |
| SOX9                            | 1.513502772                                |
| p-p70S6K(T412)                  | 1.502199291                                |
| p-FAK(Y397)                     | 0.63197919                                 |
| p-SHC(2431)(Y317)               | 0.588992037                                |
| Beta-Catenin                    | 0.460818082                                |
